1

2

3

4 **Clinical, socio-demographic, and parental correlates of early autism traits in a**  
5 **community cohort**

6 Oliver Gale-Grant<sup>1,2,3</sup>, Andrew Chew<sup>2</sup>, Shona Falconer<sup>2</sup>, Lucas G.S França<sup>1,2,4</sup>, Sunniva Fenn-Moltu<sup>1,2</sup>,

7 Laila Hadaya<sup>2,5</sup>, Nicholas Harper<sup>2</sup>, Judit Ciarrusta<sup>1</sup>, Tony Charman<sup>6</sup>, Declan Murphy<sup>1,3</sup>, Tomoki

8 Arichi<sup>2,3,7,8</sup>, Grainne McAlonan<sup>1,3</sup>, Chiara Nosarti<sup>2,5</sup>, A David Edwards<sup>2,3</sup>, Dafnis Batalle<sup>1,2</sup>

9

- 10 1. Department of Forensic and Neurodevelopmental Science, Institute of Psychiatry, Psychology &  
11 Neuroscience, King's College London, United Kingdom  
12 2. Centre for the Developing Brain, School of Imaging Sciences & Biomedical Engineering, King's  
13 College London, United Kingdom  
14 3. MRC Centre for Neurodevelopmental Disorders, King's College London, United Kingdom  
15 4. Department of Computer and Information Sciences, Faculty of Engineering and Environment,  
16 Northumbria University, United Kingdom  
17 5. Department of Child and Adolescent Psychiatry, Institute of Psychiatry, Psychology &  
18 Neuroscience, King's College London, United Kingdom  
19 6. Department of Psychology, Institute of Psychiatry, Psychology & Neuroscience, King's College  
20 London, United Kingdom  
21 7. Department of Paediatric Neurosciences, Evelina London Children's Hospital, Guy's and St  
22 Thomas' NHS Foundation Trust, United Kingdom  
23 8. Department of Bioengineering, Imperial College London, United Kingdom

24

25

26 †Corresponding author:

27 Dr. Oliver Gale-Grant  
28 Department of Forensic and Neurodevelopmental Science  
29 Institute of Psychiatry, Psychology & Neuroscience  
30 King's College London  
31 16, De Crespigny Park, SE5 8AF, London, UK  
32 +44-(0)-207-848-0922 | [oliver.gale-grant@kcl.ac.uk](mailto:oliver.gale-grant@kcl.ac.uk)

## 33 **Abstract**

34 **Background:** Autism traits emerge between the ages of 1 and 2. It is not known if experiences which  
35 increase the likelihood of childhood autism are related to early trait emergence, or if other exposures  
36 are more important. Identifying factors linked to toddler autism traits in the general population may  
37 improve our understanding of the mechanisms underlying atypical neurodevelopment.

38 **Methods:** Clinical, socio-demographic, and parental information was collected at birth from 536  
39 toddlers in London, UK (gestational age at birth, sex, maternal body mass index, age, parental  
40 education level, parental first language, parental history of neurodevelopmental disorders) and at 18  
41 months (parent cohabiting status, two measures of social deprivation, three measures of maternal  
42 parenting style, and a measure of maternal postnatal depression). General neurodevelopment was  
43 assessed with the Bayley Scales of Infant and Toddler Development, 3<sup>rd</sup> Edition (BSID-III), and autism  
44 traits were assessed using the Quantitative Checklist for Autism in Toddlers (Q-CHAT). Multivariable  
45 models were used to identify associations between variables and Q-CHAT. A model including BSID-III  
46 was used to identify factors associated with Q-CHAT independent of general neurodevelopment.  
47 Models were also evaluated addressing variable collinearity with principal component analysis (PCA).

48 **Results:** A multivariable model explained 20% of Q-CHAT variance, with four individually significant  
49 variables (two measures of parenting style and two measures of socio-economic deprivation). After  
50 adding general neurodevelopment into the model 36% of Q-CHAT variance was explained, with three  
51 individually significant variables (two measures of parenting style and one measure of language  
52 development). After addressing variable collinearity with PCA, parenting style and social deprivation  
53 were positively correlated with Q-CHAT score via a single principal component, independently of  
54 general neurodevelopment. Neither sex nor family history of autism were associated with Q-CHAT  
55 score.

56 **Limitations:** The Q-CHAT is parent rated and is therefore a subjective opinion rather than a clinical  
57 assessment. We measured Q-CHAT at a single timepoint, and to date no participant has been followed  
58 up in later childhood, so we are focused purely on emerging traits rather than clinical autism  
59 diagnoses.

60 **Conclusions:** Autism traits are common at age 18 months, and greater emergence is specifically  
61 related to exposure to early life adversity.

62

## 63 **Keywords**

64 Autism; Screening; Perinatal

65

66

67

68

69

70

71

72

73

74

75

## 76 **Background**

77 Autism spectrum disorders (ASD) are typically diagnosed between 4 and 7 years of age (1, 2). The age  
78 at symptom onset however is often lower than this, with neurodivergence first being suspected by  
79 parents in most instances between 1 and 2 years of age (3). Screening tools aiming to quantify autism  
80 traits in this age group are well established and cut-off points with high sensitivity (albeit at the cost  
81 of low specificity (4)) for predicting a future clinical autism diagnosis have been demonstrated (5, 6),  
82 although results in some real-world cohorts are less promising (7). One such tool is the Qualitative  
83 Checklist for Autism in Toddlers (Q-CHAT) (8). The Q-CHAT is a 25-item questionnaire with each item  
84 rated by the parents from 0-4. It has been validated for use in multiple countries (9-13), and has a  
85 positive predictive value of 28% for a future ASD diagnosis (using screening at two timepoints) (14).  
86 Autistic traits exist in the population as a continuum (15), and most individuals screened, typically  
87 developing or otherwise, will display at least some autism traits at age 18 months (16).

88 The likelihood of receiving an autism diagnosis is associated with both genetic and environmental  
89 factors (17, 18), and the same may be true of early autism traits. Some factors are known to correlate  
90 with autism traits at age 18 months – for example, sex (with males scoring higher than females) (7, 8,  
91 19, 20) or preterm birth (10, 21). However, beyond these factors there is a relative lack of research  
92 into what else may influence the emergence of autism traits in early life, although single studies have  
93 linked maternal nausea and vomiting during pregnancy (22), neonatal illness (23), maternal  
94 depression and anxiety (24, 25), immigrant mothers (26) and lower levels of parental education (24)  
95 with higher scores on 18 month autism screening tools. Q-CHAT score at 18 months has also been  
96 shown to be negatively correlated with general language development (10). The broader  
97 developmental phenotype is known to be influenced by a wide range of exposures, including preterm  
98 birth (27), neonatal illness (28), and multiple psychosocial factors (29-32). Given that Q-CHAT is known  
99 to correlate with general language development, it is reasonable to hypothesise that Q-CHAT scores  
100 may themselves be influenced by these same exposures.

101

102 As well as research using structured tools there are previous studies which examine exposures  
103 associated with single features of social communication development in toddlerhood. Multiple factors  
104 including less responsive or less effective maternal parenting styles (33, 34), greater maternal  
105 depression and experience of trauma (35) and a lower quality home environment (36) have been  
106 correlated with less favourable social communication development in toddlerhood.

107 Because greater autism trait emergence at age 18 months is associated with a greater likelihood of  
108 childhood autism (14) understanding correlates of the Q-CHAT score at 18 months may help us to  
109 understand what early life experiences are associated with an increased likelihood of a future autism  
110 diagnosis in some individuals. The developing Human Connectome Project (dHCP) has collected Q-  
111 CHAT scores, other neurodevelopmental measures and demographic information from a large cohort  
112 of 18-month-old toddlers in London, UK. Using this dataset, we aimed to characterise correlates of Q-  
113 CHAT score. We hypothesised that, in keeping with the known associations between early life  
114 adversity and other measures of neurodevelopment, we would observe a pattern of psychosocial  
115 adversity being associated with higher Q-CHAT scores. Relationships between variables and Q-CHAT  
116 score are presented in both univariable (in part to inform future studies which may only have some of  
117 our variables available) and multivariable models, with scores from the Bayley Scales of Infant and  
118 Toddler Development, 3<sup>rd</sup> Edition (BSID-III) (37) additionally included as a covariate to understand  
119 whether any relationships between these early life experiences and autism traits are influenced by  
120 general neurodevelopment.

121

122

123

124

## 125 **Methods**

### 126 **Sample**

127 This study is based on a sample of neonates participating in the Developing Human Connectome  
128 Project (dHCP, <http://www.developingconnectome.org/>). Participants were all recruited at St  
129 Thomas' Hospital, London, UK. There were no specific inclusion or exclusion criteria for enrolment in  
130 this study, and recruitment was primarily from the antenatal clinic with no specific stratification.

131 Toddlers were invited for neurodevelopmental assessment at 18 months post-expected delivery date;  
132 appointments were made according to family availability as close as possible to this time-point. The  
133 only inclusion criteria for this manuscript from the overall cohort was completion of the  
134 neurodevelopmental assessment. There were no exclusion criteria.

135 This project has received UK NHS research ethics committee approval (14/LO/1169, IRAS 138070), and  
136 conducted in accordance with the World Medical Association's Code of Ethics (Declaration of Helsinki).

137 Written informed consent was obtained from parents at recruitment into the study.

138

### 139 **Data Collection**

140 Data collection took place either at St Thomas' Hospital, London, UK, or via questionnaires distributed  
141 to the participants' parents. At the time of birth, clinical variables, gestational age at birth and sex  
142 were extracted from the medical records of participants in the study; and maternal age, maternal pre-  
143 pregnancy BMI, and parent ASD/attention deficit hyperactivity disorder (ADHD) history were also  
144 collected via a maternal questionnaire. The last of these was asked in the format "Have you or your  
145 child's biological father ever been diagnosed with Attention Deficit Hyperactivity Disorder (ADHD) or  
146 Autism?" This was a yes/no question.

147 At the time of birth, the socio-demographic status of participant families was recorded as measured  
148 by the Index of Multiple Deprivation Rank (IMD), a postcode-based score assigned to every address in  
149 the UK which gives a composite measure of socio-economic disadvantage, based on the mother's  
150 address at the time of birth. A lower score corresponds to greater geographical deprivation, with 1  
151 being the lowest score possible and 32,844 being the highest score possible.

152 Further socio-demographic information was collected by questionnaire: maternal age at leaving  
153 education ("At what age were you last in full time education?"), maternal 1<sup>st</sup> language ("Is English your  
154 first language?"), and parent cohabiting status. The Cognitively Stimulating Parenting Scale (CSPS), a  
155 questionnaire assessing the availability of resources to support cognitively stimulation parenting,  
156 associated to both parenting style and socio-economic deprivation was also collected (38, 39). The  
157 CSPS was updated to include items relating to access to mobile phones and apps. A higher score is  
158 indicative of a more stimulating home environment, with a minimum possible score of 0 and a  
159 maximum possible score of 40. The Q-CHAT score (a parent reported questionnaire) was collected at  
160 the time of 18-month follow-up. This gives a score between 0 and 100, with higher scores indicative  
161 of more autism traits. The Bayley Scales of Infant and Toddler Development, 3<sup>rd</sup> edition (BSID-III) (37),  
162 was administered by either a Chartered Psychologist or Paediatrician when the children were 18-  
163 months of age. The composite scores (Cognitive, Motor and Language) are used for analysis in this  
164 study. Two measures of parenting style were also collected at this time. The first of these, the  
165 Parenting Scale (40), is a self-reported tool that measures three different dimensions of parenting:  
166 Laxness, the tendency to behave passively and give in to misbehaviour; Over-reactivity, which  
167 measures anger, meanness and irritability in parenting; and Verbosity, a measure of parental  
168 dependence on talking even when ineffective as a discipline style. The dimensions have a minimum  
169 score of 1, and a maximum of 7. The Edinburgh Postnatal Depression Scale (EPDS) was also completed  
170 at follow-up. This is a well-established self-reported tool for quantifying postnatal depressive  
171 symptoms, with a minimum score of 0 and a maximum of 30. Higher scores are indicative of more  
172 depressive symptoms (41).

173

## 174 **Statistical Analysis**

175 Univariable associations between variables and Q-CHAT score were tested by Pearson's correlation or  
176 t-test as appropriate. Associations between variables of interest and Q-CHAT score were assessed by  
177 generalized linear model (GLM). Statistical significance was tested with random permutation tests,  
178 using 10,000 permutations. P-values are reported uncorrected, with those surviving multiple  
179 comparisons via false discovery rate (FDR) indicated (42). Principal component analysis was used to  
180 characterize the latent structure of independent variables, and to address collinearity between linear  
181 variables. The "elbow method" (43) was used to determine the optimal number of principal  
182 components (PCs) to use in later analyses. Associations between PC scores and the original input  
183 variables was determined by Pearson's correlation, with  $p < 0.05$  after FDR correction considered  
184 significant.

185

186 Analyses were performed and figures made using Rstudio v4.0.2 (Rstudio, MA, U.S.A). The  
187 "FDRestimation", and "corrplot" packages were additionally used (44, 45). PCA was performed using  
188 the "prcomp" function from base R rather than a dedicated package. Our code to implement random  
189 permutation tests for GLMs in R can be downloaded from <https://github.com/CoDe-Neuro/ptestR>.

## 190 **Data availability**

191 The dHCP is an open-access project. Data from the project can be downloaded by registering at  
192 <https://data.developingconnectome.org> . Analyses presented here include data to be included in  
193 future releases.

194

195

196



## 197 **Results**

### 198 **Population**

199 At the time of the study commencing, 644 individuals in the dHCP dataset had a Q-CHAT score  
200 available. Of these 536 had a complete set of demographic data and were included in the study. A  
201 comparison between individuals included and excluded is shown in Supplementary Table S1. There  
202 were some differences between those included and excluded – individuals included in the study  
203 experienced on average lower geographical deprivation (IMD Rank), lower maternal depression, and  
204 less extreme parenting styles. The characteristics of the sample used, and the univariate relationships  
205 of each variable to Q-CHAT score are shown in Table 1. A frequency distribution of Q-CHAT scores is  
206 in Supplementary Figure S1.

207

208 *---Table 1 approximately here---*

209

210 Nine variables were significantly associated with Q-CHAT score. BMI ( $r=0.093$ ,  $p=0.030$ ), EPDS  
211 ( $r=0.127$ ,  $p<0.001$ ), and three measures of maternal parenting style; laxness ( $r=0.286$ ,  $p<0.001$ ), over-  
212 reactivity ( $r=0.180$ ,  $p<0.001$ ) and verbosity ( $r=0.300$ ,  $p<0.001$ ) were positively correlated with Q-CHAT  
213 score, and mother's age ( $r=-0.105$ ,  $p=0.014$ ), IMD rank ( $r=-0.190$ ,  $p<0.001$ ) and CSPA score ( $r=-0.219$ ,  
214  $p<0.001$ ) were negatively correlated with Q-CHAT score. Total Q-CHAT scores were significantly higher  
215 in individuals whose mother's spoke a language other than English as their 1<sup>st</sup> language ( $t=4.52$ ,  
216  $p<0.001$ ).

217 All BSID-III composite scores were negatively associated with Q-CHAT score. The strongest association  
218 was with Language Composite Score ( $r=-0.528$ ,  $p<0.001$ ).

### 219 **Multivariable models of Q-CHAT score**

220 We assessed the association of all variables with Q-CHAT score in two separate multivariable models,  
221 with or without the addition of BSID-III composite scores to control for the effect of general  
222 neurodevelopment and identify specific relationships between demographic variables and Q-CHAT  
223 score.

224

225 *---Table 2 approximately here---*

226

227 A multivariable model without BSID-III explained 20% of Q-CHAT variance. After FDR correction four  
228 variables were individually associated with Q-CHAT score: IMD Rank ( $t=-2.56, p=0.010$ ) and CSPA ( $t=-$   
229  $3.38, p<0.001$ ) were negatively associated and Mother Laxness ( $t=3.79, p<0.001$ ) and Mother Verbosity  
230 ( $t=3.29, p=0.001$ ) were positively associated. After adding BSID-III composite scores to the model two  
231 of these (Mother Laxness and Mother Verbosity) remained significantly associated with Total Q-CHAT  
232 score ( $t=2.68, p=0.007$  and  $t=3.39, p<0.001$  respectively), in addition to BSID-III language composite  
233 score ( $t=-8.32, p<0.001$ ), which was negatively associated with Total Q-CHAT score. Notably sex and  
234 parent ASD/ADHD diagnosis status did not correlate individually with Q-CHAT score in either model.

235

236 *--- Figure 1 approximately here ---*

237

238 A limitation of interpreting these models is the collinearity between demographic variables (Figure  
239 1A). In order to address this without removing variables from the model, we performed a PCA of the  
240 linear variables to obtain orthogonal components, which we then used in a general linear model in  
241 place of the original linear variables (46). We selected the first 3 principal components (PCs) to  
242 represent our data (Figure 1B). The multivariable models associating demographic variables and BSID-  
243 III composite scores with Q-CHAT score (Table 2) were subsequently repeated, with linear variables

244 being replaced by PCA components 1-3 (Table 3). Details of variable correlations with each PC are  
245 shown in Figure 1D. PC1 captures variable associations which are associated with positive parenting  
246 styles and low socio-economic deprivation, PC2 is associated with socio-economic deprivation and a  
247 less stimulating home environment, and PC3 is associated with low clinical adversity.

248 17% of Q-CHAT variance was explained by a model including 3 PCs and the categorical variables only,  
249 with only PC1 remaining statistically significant in the model after FDR correction ( $t=-8.17$ ,  $p<0.001$ ,  
250 Table 3). 36% of Q-CHAT variance was explained by the model including BSID-III scores to account for  
251 general neurodevelopment, with PC1 and BSID-III language composite scores statistically significant  
252 ( $t=-6.59$  and  $t=-8.96$  respectively,  $p<0.001$ , Table 3).

253

254 *---Table 3 approximately here---*

255

256 PC1 (positive parenting styles and low socio-economic deprivation) is negatively correlated with Q-  
257 CHAT score ( $t=-8.17$ ,  $p<0.001$ ) - ie, individuals with more adversity have lower Q-CHAT scores. Via this  
258 PC we can see that maternal age at last full-time education, three measures of parenting style and  
259 EPDS are positively associated with Q-CHAT score; whereas maternal age at leaving education and  
260 IMD rank are negatively associated with Q-CHAT score. Once again it is worth noting that sex and  
261 parent ASD/ADHD diagnosis status did not correlate with Q-CHAT score in either model.

262

263

264

265

266

## 267 **Discussion**

268 We observed correlations of Q-CHAT score with measures of parenting style and measures of socio-  
269 demographic adversity, with the former category demonstrating the strongest associations.  
270 Conversely, some variables known to increase the likelihood of an autism diagnosis in later childhood,  
271 such as male sex (47), a family history of autism (48) and gestational age at birth (49) were not  
272 associated with Q-CHAT scores.

273 A multivariable model of demographic variables explained 20% of Q-CHAT variance. In this model four  
274 variables (two measures of social deprivation and two measures of parenting style) were individually  
275 significantly associated with Q-CHAT score. Adding measures of general neurodevelopment to this  
276 model increased the explained variance to 36%, however this also resulted in two variables, IMD Rank  
277 and CSPA (measures of social deprivation) no longer being individually significantly associated with Q-  
278 CHAT score. Taken together this suggests that maternal parenting style is specifically associated with  
279 Q-CHAT score, whereas that the association of social deprivation with Q-CHAT is partially explained  
280 by general neurodevelopment.

281 Maternal verbosity had the strongest association with Q-CHAT score of any variable tested, remaining  
282 significantly associated with Q-CHAT score in multivariable models with and without general  
283 neurodevelopment. The mechanism via which this association occurs is unknown, but several  
284 pathways are plausible. Parenting and affection display styles are heritable traits, and it may be that  
285 the genetic and environmental factors contributing to adverse parenting styles also contribute to  
286 autism trait emergence in toddlerhood (50, 51). Previous studies have suggested that parenting styles  
287 directly influence childhood behaviour, as children learn by repetition (52, 53). Parent-child  
288 relationships of children with childhood autism diagnoses are also more likely to be discordant than  
289 those of neurotypical offspring (54). This discordance is thought to be both a cause and consequence  
290 of difficulties in social understanding (55, 56), and it is possible that even at 18 months toddlers

291 displaying more autism traits have greater difficulty relating to their parents, leading to greater  
292 discordance (57, 58). In support of this hypothesis a recent randomised controlled trial demonstrated  
293 that a 10-session therapist delivered parenting skills intervention, which promoted concordant  
294 interaction, led to a roughly 3 fold reduction in autism diagnoses 2 years later (59). However, parenting  
295 styles are at least partly heritable (60), hence it is also possible that the offspring of parents who  
296 naturally display more verbose and less collaborative parenting styles experience more difficulties  
297 developing social relationship abilities, and thus score more highly on the Q-CHAT. A final possibility  
298 is that maternal verbosity is in part a proxy measure of other forms of adversity: Verbosity has been  
299 previously shown to correlate with multiple measures of maternal stress (61), which in turn has  
300 previously been reported to correlate with a higher likelihood of offspring autism (62). All dimensions  
301 of parenting style are correlated with IMD rank in our data (Figure 1), and this is in keeping with a  
302 body of literature demonstrating associations between parenting style and socio-economic status  
303 (63). A more deeply phenotyped sample would be required to investigate how and if these different  
304 factors influence the relationship between maternal verbosity and Q-CHAT score. We do not seek to  
305 suggest that the emergence of autism traits is something parents can control, and a final possible  
306 interpretation of the correlation between maternal parenting style and autism trait emergence is  
307 reporting bias. Given that both the Q-CHAT and the parenting style questionnaire are self-reported  
308 tools individual patterns of response could relate to a wide number of factors, including mental state,  
309 intellectual ability and neurodevelopmental profile. Future studies could consider clinician  
310 administered measures to address this issue. There is another limitation to our findings here – we did  
311 not ask any questions about family composition or care arrangements beyond parent cohabiting  
312 status – we therefore do not know if the mother was the primary caregiver for each child included.

313 Based on previous literature, some of our results are expected, while others are unexpected. For  
314 instance, we showed that multiple measures of psychosocial disadvantage correlate with higher Q-  
315 CHAT scores. There is a significant body of evidence demonstrating that early life adversity affects  
316 several domains of early childhood behaviour, including cognitive (29), motor (30), and language (64)

317 development, as well as emerging psychopathologies (25, 65). It is known that lower socio-economic  
318 status correlates with higher scores on the precursor to the Q-CHAT, the M-CHAT (32). Also, one  
319 previous study has specifically reported higher Q-CHAT scores in the offspring of depressed mothers  
320 (24). Therefore, our finding that maternal depressive symptom burden, measured using EPDS,  
321 correlates with offspring Q-CHAT score is not unexpected. In keeping with existing knowledge about  
322 neurodevelopment is our finding that two measures of social adversity correlate with higher Q-CHAT  
323 score. Our finding of a univariable association between maternal first language and Q-CHAT score is  
324 also in keeping with a body of previous literature which demonstrates a higher rate of autism  
325 diagnoses in children from immigrant backgrounds. It is likely that parent first language not being  
326 English represents an increased risk of experiencing other adversities (66), rather than inferring that  
327 being raised in a bilingual environment has an effect on autism trait emergence, which is not thought  
328 to be the case (67).

329 We unexpectedly found no association between sex and Q-CHAT score in any analysis performed. A  
330 handful of previous studies have demonstrated higher Q-CHAT scores in male toddlers compared to  
331 female toddlers, with small but significant average score differences (3.1 (68), 3.1 (69) and 1.9 (8))  
332 reported. It is not immediately obvious why we do not see the same difference in our data, although  
333 it may be that in a larger sample this difference would have been apparent. Males in our cohort did in  
334 fact score 1.4 Q-CHAT points higher than females on average (Cohen's  $d = 0.16$ ), but the difference is  
335 not statistically significant. Similarly in a multivariable model the individual correlation between sex  
336 and Q-CHAT score is apparent ( $t=-2.32$ ,  $p=0.020$ , Table 2) but did not survive FDR correction. It would  
337 be more appropriate to say that there is a trend towards males having higher Q-CHAT scores in our  
338 data than that there is no association at all.

339 We also found no significant association between parental history of ASD and Q-CHAT score in any  
340 analysis performed. A difference may reasonably have been expected based on the known familial  
341 increased likelihood of autism and ADHD diagnoses (48, 70). To date, one study has directly reported

342 on the association between parental history of ASD and Q-CHAT score and found a large group  
343 difference, with the familial ASD history group having higher Q-CHAT scores at age 16-30 months (71).  
344 One other study has specifically examined the difference between Q-CHAT scores in individuals with  
345 and without an older sibling with autism, and also found significant group differences (72). It is not  
346 clear why we do not see the same effect here, although it is possible that the method in which we  
347 recorded family history (the mother was asked only if she or her partner had ever been diagnosed  
348 with autism) was too narrow a definition (a more broad dimensional assessment would have been  
349 preferable), or alternatively it may be the case that we lacked sufficient positive cases (28 parents  
350 reported an ASD or ADHD diagnosis compared to 506 with no diagnosis) to have determinative power.  
351 Parents were also asked if the child participating in the study had an older sibling with an autism or  
352 ADHD diagnosis – as only 206 individuals had older siblings we have not included this variable in the  
353 main analysis. There was similarly no difference ( $t=-0.51$ ,  $p=0.62$ ) in mean Q-CHAT score between  
354 those with ( $n=23$ , mean Q-CHAT = 31.4) and without ( $n=183$ , mean Q-CHAT = 30.1) an older sibling  
355 with a neurodevelopmental diagnosis. This may again be due to an insufficient number of positive  
356 cases for determinant power.

357 It has been previously reported that preterm birth confers an increasing likelihood of both childhood  
358 autism diagnosis and greater early autism trait emergence (73, 74). One previous study reports Q-  
359 CHAT scores in a cohort of toddlers born before 30 weeks of gestation, who scored a mean of 33.7  
360 (10), although to our knowledge no direct comparison of Q-CHAT scores in individuals born term and  
361 preterm has yet been presented. In our cohort we find no association between gestational age at birth  
362 and Q-CHAT score directly through univariable or multivariable associations, or indirectly via PCA  
363 latent components. One possibility is that early life autism trait emergence is less readily detected by  
364 screening tools in some preterm children (75, 76). Although we have used gestational age as a linear  
365 variable if we consider preterm birth as a binary variable there is also no difference between groups.  
366 The mean Q-CHAT of individuals born preterm is 30.1, and the mean Q-CHAT of individuals born at  
367 term is 30.1. The mean Q-CHAT scores in individuals born before 30 weeks gestation in our sample

368 (n=36) is however 34.6, which is in keeping with the 33.7 average score reported by Wong et al. (2014)  
369 using the same criteria. Further research is needed to understand how the degree of prematurity  
370 effects early life autism trait emergence.

371 A finding of particular interest is how associations between demographic variables and Q-CHAT score  
372 were influenced by general neurodevelopment, which in our study is represented by BSID-III. All BSID-  
373 III composite scores correlated individually to the Q-CHAT score (Table 1). In a multivariable model  
374 without BSID-III scores four variables (two socio-demographic measures, and two measures of  
375 parenting style) were significantly associated with Q-CHAT score (Table 2). With BSID-III composite  
376 scores added to the model the two socio-demographic associations were no longer significant,  
377 although the BSID-III language composite score association was. This is possibly in part due to co-  
378 linearity of the input variables (Figure 1A). After transforming linear variables into latent orthogonal  
379 components with PCA, PC1 (associated with positive parenting styles and low socio-economic  
380 deprivation), was significantly negatively associated with Q-CHAT score with or without BSID-III scores  
381 as a confounder – i.e., more early life adversity was associated with more autism traits (Table 3). PC1  
382 was significantly associated with Q-CHAT score in both models, suggesting that socio-demographic  
383 and parental factors are specifically influencing autism trait development as opposed to solely having  
384 a general effect on neurodevelopment. Using PC1, we can see how our original variables contribute  
385 to Q-CHAT score (Figure 1D). Some of the variables contributing to PC1 are expected based on our  
386 univariable results and previous literature; via PC1, early life adversity is associated with more autism  
387 traits, and maternal depression and more extreme parenting style is associated with more autism  
388 traits. Two variables however correlate in a less intuitive fashion. Firstly, maternal age is positively  
389 contributing to the association with Q-CHAT score (Figure 1D). This is not in keeping with a significant  
390 body of literature that suggests that the offspring of older parents have a higher likelihood of autism  
391 (77). One possible explanation is that there are aspects of social deprivation that we are not capturing  
392 with our variables, for example income or wider availability of family support, which may be related  
393 to both parental age and autism trait development. Secondly, maternal age at leaving full time



394 education is positively contributing to the association with Q-CHAT score via the PC1. Given that  
395 greater social deprivation in our sample is in general associated with higher Q-CHAT scores this is  
396 somewhat counter-intuitive and is not in keeping with the one previous exploratory study to report  
397 on this association (24). There is a larger body of work regarding associations of parental education  
398 and childhood autism diagnoses, with at least some research suggesting that autism is more  
399 commonly diagnosed in the offspring of highly educated parents (78), so the same may be true of  
400 early life autism trait development. The reasons behind this difference are potentially complex,  
401 including greater access to medical professionals in more affluent families (79), diagnostic  
402 overshadowing (80) and more stigmatising views towards autism sometimes held by less educated  
403 parents (81).

404 Our findings suggest some possible avenues for future research. Deeply phenotyped and well powered  
405 prospective cohort studies of childhood autism are needed, but given the prevalence of the condition  
406 sample sizes would need to be extremely large to allow for firm conclusions to be drawn. A more  
407 logistically favourable approach to further examining some of the antecedents of autism trait  
408 development we (and other authors) have proposed would be to focus on groups hypothesised to be  
409 more likely to develop a high level of traits. This study design is well established when examining the  
410 sequelae of a family history of autism (82), and has also been used to study the effects of parental  
411 immigration (66) and depression (83). We suggest that a cohort experiencing severe psycho-social  
412 deprivation is a potential avenue in the study of early life autism traits.

413

414

415

416

417

## 418 **Limitations**

419 There are some further limitations to our findings in addition to those discussed above. The cohort  
420 used is from a single study centre, and therefore may not be representative of the wider population.  
421 The sub-sample included in this study also differs from those excluded, in general experiencing less  
422 psycho-social adversity, with differences observed in IMD Rank, maternal parenting style and EPDS  
423 score. The nature of the scale is itself also a limitation: the Q-CHAT is parent rated, and therefore is  
424 indicative of the parent's subjective assessment of their child, rather than an objective test (23); it is  
425 thus possible that reporting bias with common method variance could have altered our results.

426 A general linear model of all socio-demographic factors studied explained 20% of the variance of Q-  
427 CHAT score. Whilst this is a promising finding there are clearly a number of non-studied factors which  
428 may contribute to individual patterns of autism trait emergence, including genetics and medical  
429 comorbidities. Although emerging traits at age 18 months increase the likelihood of a future diagnosis  
430 of autism, the positive predictive value of a high Q-CHAT score (or indeed a high score on any early  
431 autism screening tool) is low (84). The prevalence of childhood autism in the UK is approximately 1.8%  
432 (85). If this prevalence is seen in our cohort then approximately 10 individuals may be expected to  
433 receive an autism diagnosis, meaning that what we are largely studying here are variations in the  
434 spectrum of typical development, which may (86) or may not (87) be of any real world relevance.  
435 Some of our more unexpected findings (for example the lack of a robust association between Q-CHAT  
436 score and sex) may in part be explained by a difference between the underlying nature of a clinical  
437 autism diagnoses and the expression of autism traits in the wider population. We hope in future to  
438 follow-up this cohort in childhood, which will allow us to re-analyse if the same factors we find here  
439 to be predictive of autism trait emergence are also predictive of diagnostic status.

440

## 441 **Conclusions**

442 Autism traits at age 18 months in a typical population are associated with several prior exposures,  
443 most significantly parenting styles. In multivariable models 20% of variance of Q-CHAT score can be  
444 explained by socio-economic and parental factors, with the universal finding being that a less  
445 favourable environment results in a higher Q-CHAT score (more autism traits). Our results are of  
446 potential interest from two perspectives. Firstly, future authors investigating the Q-CHAT score and  
447 other measures of early autism traits should be aware of our findings as potential confounders or  
448 limiting factors in their work. Secondly, from our data it would be reasonable to expect a greater rate  
449 of diagnoses in more socio-economically deprived children, which does not currently occur. Are  
450 potential autism diagnoses being missed in more socially deprived groups?

451

452

453

454

455

456

457

458

## 459 **Declarations**

### 460 **Ethical Approval**

461 This project has received UK NHS research ethics committee approval (14/LO/1169, IRAS 138070), and  
462 conducted in accordance with the World Medical Association's Code of Ethics (Declaration of Helsinki).  
463 Written informed consent was obtained from parents at recruitment into the study.

### 464 **Competing Interests**

465 No author has a competing interest to declare.

### 466 **Data availability**

467 The dHCP is an open-access project. Data from the project can be downloaded by registering at  
468 <https://data.developingconnectome.org> . Analyses presented here include data to be included in  
469 future releases.

### 470 **Author Contributions**

471 All authors met ICJME criteria for authorship. **OGG** – conception, analysis, interpretation, writing  
472 original draft, final approval, accountability, **AC** – data collection, writing, review and editing, final  
473 approval, accountability, **SF** - data collection, writing, review and editing, final approval,  
474 accountability, **LF** – software, analysis, writing, review and editing, final approval, accountability,  
475 **SFM** – interpretation, writing, review and editing, final approval, accountability, **LH** – interpretation,  
476 writing, review and editing, final approval, accountability, **NH** – data curation, interpretation,  
477 writing, review and editing, final approval, accountability, **TC** – interpretation, writing, review and  
478 editing, final approval, accountability, **DM** – interpretation, analysis, writing, review and editing, final  
479 approval, accountability, **TA** – data collection, interpretation, writing, review and editing, final  
480 approval, accountability, **GM** – interpretation, analysis, writing, review and editing, final approval,  
481 accountability, **CN** – interpretation, analysis, writing, review and editing, final approval,

482 accountability, **DE** – interpretation, analysis, final approval, accountability, **DB** – conception, analysis,  
483 interpretation, writing original draft, final approval, accountability.

#### 484 **Funding**

485 This work was supported by the European Research Council under the European Union's Seventh  
486 Framework Programme (FP7/20072013)/ERC grant agreement no. 319456 (dHCP project). The  
487 authors acknowledge infrastructure support from the National Institute for Health Research (NIHR)  
488 Mental Health Biomedical Research Centre (BRC) at South London, Maudsley NHS Foundation Trust  
489 and King's College London and the NIHR-BRC at Guys and St Thomas' Hospitals NHS Foundation Trust  
490 (GSTFT). The authors also acknowledge support in part from the Wellcome Engineering and Physical  
491 Sciences Research Council (EPSRC) Centre for Medical Engineering at Kings College London [WT  
492 203148/Z/16/Z], MRC strategic grant [MR/K006355/1], Medical Research Council Centre grant  
493 [MR/N026063/1], the Department of Health through an NIHR Comprehensive Biomedical Research  
494 Centre Award (to Guy's and St. Thomas' National Health Service (NHS) Foundation Trust in  
495 partnership with King's College London and King's College Hospital NHS Foundation Trust), the  
496 Sackler Institute for Translational Neurodevelopment at King's College London and the European  
497 Autism Interventions (EU-AIMS) trial and the EU AIMS-2-TRIALS, a European Innovative Medicines  
498 Initiative Joint Undertaking under Grant Agreements No. 115300 and 777394, the resources of which  
499 are composed of financial contributions from the European Union's Seventh Framework Programme  
500 (Grant FP7/2007–2013) and Horizon 2020 from the European Federation of Pharmaceutical  
501 industries and Associations companies' in-kind contributions, and from Autism Speaks, Autistica, and  
502 the Simons Foundation for Autism Research Initiative. OGG is supported by a grant from the UK  
503 Medical Research Council / Sackler Foundation [MR/P502108/1]. SFM is supported by the UK  
504 Medical Research Council (MR/N013700/1) and King's College London member of the MRC Doctoral  
505 Training Partnership in Biomedical Sciences. TA is supported by a MRC Clinician Scientist Fellowship  
506 [MR/P008712/1] and Transition Support Award [MR/V036874/1]. DB received support from a

507 Wellcome Trust Seed Award in Science [217316/Z/19/Z]. The views expressed are those of the  
508 authors and not necessarily those of the NHS, the National Institute for Health Research or the  
509 Department of Health. The funders had no role in the design and conduct of the study; collection,  
510 management, analysis, and interpretation of the data; preparation, review, or approval of the  
511 manuscript; and decision to submit the manuscript for publication.

512

513

514

515

516

517

518

519

520

521

522

## 523 References

- 524 1. Brett D, Warnell F, McConachie H, Parr JR. Factors Affecting Age at ASD Diagnosis in UK: No  
525 Evidence that Diagnosis Age has Decreased Between 2004 and 2014. *J Autism Dev Disord*.  
526 2016;46(6):1974-84.
- 527 2. Daniels AM, Mandell DS. Explaining differences in age at autism spectrum disorder  
528 diagnosis: a critical review. *Autism*. 2014;18(5):583-97.
- 529 3. Crane L, Chester JW, Goddard L, Henry LA, Hill E. Experiences of autism diagnosis: A survey  
530 of over 1000 parents in the United Kingdom. *Autism*. 2016;20(2):153-62.
- 531 4. Schjøberg S, Shic F, Volkmar FR, Nordahl-Hansen A, Stenberg N, Torske T, et al. What are we  
532 optimizing for in autism screening? Examination of algorithmic changes in the M-CHAT. *Autism Res*.  
533 2022;15(2):296-304.
- 534 5. Jullien S. Screening for autistic spectrum disorder in early childhood. *BMC Pediatr*.  
535 2021;21(Suppl 1):349.
- 536 6. Toh T-H, Tan VW-Y, Lau PS-T, Kiyu A. Accuracy of Modified Checklist for Autism in Toddlers  
537 (M-CHAT) in detecting autism and other developmental disorders in community clinics. *J Autism Dev*  
538 *Disord*. 2018;48(1):28-35.
- 539 7. Guthrie W, Wallis K, Bennett A, Brooks E, Dudley J, Gerdes M, et al. Accuracy of Autism  
540 Screening in a Large Pediatric Network. *Pediatrics*. 2019;144(4).
- 541 8. Allison C, Baron-Cohen S, Wheelwright S, Charman T, Richler J, Pasco G, et al. The Q-CHAT  
542 (Quantitative CHECKlist for Autism in Toddlers): a normally distributed quantitative measure of  
543 autistic traits at 18-24 months of age: preliminary report. *J Autism Dev Disord*. 2008;38(8):1414-25.
- 544 9. Ruta L, Chiarotti F, Arduino GM, Apicella F, Leonardi E, Maggio R, et al. Validation of the  
545 Quantitative Checklist for Autism in Toddlers in an Italian Clinical Sample of Young Children With  
546 Autism and Other Developmental Disorders. *Front Psychiatry*. 2019;10:488-.
- 547 10. Wong HS, Huertas-Ceballos A, Cowan FM, Modi N. Evaluation of early childhood social-  
548 communication difficulties in children born preterm using the Quantitative Checklist for Autism in  
549 Toddlers. *J Pediatr*. 2014;164(1):26-33.e1.
- 550 11. Magiati I, Goh DA, Lim SJ, Gan DZ, Leong JC, Allison C, et al. The psychometric properties of  
551 the Quantitative-Checklist for Autism in Toddlers (Q-CHAT) as a measure of autistic traits in a  
552 community sample of Singaporean infants and toddlers. *Mol Autism*. 2015;6:40.
- 553 12. Park S, Won EK, Lee JH, Yoon S, Park EJ, Kim AY. Reliability and Validity of the Korean  
554 Translation of Quantitative Checklist for Autism in Toddlers: A Preliminary Study. *Soa Chongsonyon*  
555 *Chongsin Uihak*. 2018;29(2):80-5.
- 556 13. Mohammadian M, Zarafshan H, Mohammadi MR, Karimi I. Evaluating Reliability and  
557 Predictive Validity of the Persian Translation of Quantitative Checklist for Autism in Toddlers (Q-  
558 CHAT). *Iran J Psychiatry*. 2015;10(1):64-70.
- 559 14. Allison C, Matthews FE, Ruta L, Pasco G, Soufer R, Brayne C, et al. Quantitative Checklist for  
560 Autism in Toddlers (Q-CHAT). A population screening study with follow-up: the case for multiple  
561 time-point screening for autism. *BMJ Paediatrics Open*. 2021;5(1):e000700.
- 562 15. Koolschijn PC, Geurts HM, van der Leij AR, Scholte HS. Are Autistic Traits in the General  
563 Population Related to Global and Regional Brain Differences? *J Autism Dev Disord*. 2015;45(9):2779-  
564 91.
- 565 16. Tsompanidis A, Aydin E, Padaigaitė E, Richards G, Allison C, Hackett G, et al. Maternal steroid  
566 levels and the autistic traits of the mother and infant. *Mol Autism*. 2021;12(1):51.
- 567 17. Thapar A, Rutter M. Genetic advances in autism. *Journal of autism and developmental*  
568 *disorders*. 2021;51:4321-32.
- 569 18. Chaste P, Leboyer M. Autism risk factors: genes, environment, and gene-environment  
570 interactions. *Dialogues in clinical neuroscience*. 2022.

- 571 19. Auyeung B, Ahluwalia J, Thomson L, Taylor K, Hackett G, O'Donnell KJ, et al. Prenatal versus  
572 postnatal sex steroid hormone effects on autistic traits in children at 18 to 24 months of age. *Mol*  
573 *Autism*. 2012;3(1):17.
- 574 20. Eldeeb SY, Ludwig NN, Wieckowski AT, Dieckhaus MF, Algur Y, Ryan V, et al. Sex differences  
575 in early autism screening using the Modified Checklist for Autism in Toddlers, Revised, with Follow-  
576 Up (M-CHAT-R/F). *Autism*. 2023:13623613231154728.
- 577 21. Gray PH, Edwards DM, O'Callaghan MJ, Gibbons K. Screening for autism spectrum disorder in  
578 very preterm infants during early childhood. *Early Human Development*. 2015;91(4):271-6.
- 579 22. Syn NL, Chan S-Y, Chia EWY, Ong WX, Phua D, Cai S, et al. Severity of nausea and vomiting in  
580 pregnancy and early childhood neurobehavioural outcomes: The Growing Up in Singapore Towards  
581 Healthy Outcomes study. *Paediatric and Perinatal Epidemiology*. 2021;35(1):98-108.
- 582 23. Ravi S, Chandrasekaran V, Kattimani S, Subramanian M. Maternal and birth risk factors for  
583 children screening positive for autism spectrum disorders on M-CHAT-R. *Asian Journal of Psychiatry*.  
584 2016;22:17-21.
- 585 24. Goh DA, Gan D, Kung J, Baron-Cohen S, Allison C, Chen H, et al. Child, Maternal and  
586 Demographic Factors Influencing Caregiver-Reported Autistic Trait Symptomatology in Toddlers. *J*  
587 *Autism Dev Disord*. 2018;48(4):1325-37.
- 588 25. Kleine I, Vamvakas G, Lautarescu A, Falconer S, Chew A, Counsell SJ, et al. Postnatal maternal  
589 depressive symptoms and behavioural outcomes in term- and preterm-born toddlers. *medRxiv*.  
590 2021:2021.09.21.21263881.
- 591 26. Schmengler H, El-Khoury Lesueur F, Yermachenko A, Taine M, Cohen D, Peyre H, et al.  
592 Maternal immigrant status and signs of neurodevelopmental problems in early childhood: The  
593 French representative ELFE birth cohort. *Autism Res*. 2019;12(12):1845-59.
- 594 27. Spencer-Smith MM, Spittle AJ, Lee KJ, Doyle LW, Anderson PJ. Bayley-III Cognitive and  
595 Language Scales in Preterm Children. *Pediatrics*. 2015;135(5):e1258-65.
- 596 28. Rao R, Trivedi S, Distler A, Liao S, Vesoulis Z, Smyser C, et al. Neurodevelopmental Outcomes  
597 in Neonates with Mild Hypoxic Ischemic Encephalopathy Treated with Therapeutic Hypothermia. *Am*  
598 *J Perinatol*. 2019;36(13):1337-43.
- 599 29. Ross GS, Perlman JM. Relationships of biological and environmental factors to cognition of  
600 preterm infants in the toddler and preschool periods. *Dev Psychobiol*. 2019;61(7):1100-6.
- 601 30. Ferreira L, Godinez I, Gabbard C, Vieira JLL, Caçola P. Motor development in school-age  
602 children is associated with the home environment including socio-economic status. *Child Care*  
603 *Health Dev*. 2018;44(6):801-6.
- 604 31. Neamah HH, Sudfeld C, McCoy DC, Fink G, Fawzi WW, Masanja H, et al. Intimate Partner  
605 Violence, Depression, and Child Growth and Development. *Pediatrics*. 2018;142(1).
- 606 32. Khowaja MK, Hazzard AP, Robins DL. Sociodemographic Barriers to Early Detection of  
607 Autism: Screening and Evaluation Using the M-CHAT, M-CHAT-R, and Follow-Up. *J Autism Dev*  
608 *Disord*. 2015;45(6):1797-808.
- 609 33. Harker CM, Ibañez LV, Nguyen TP, Messinger DS, Stone WL. The Effect of Parenting Style on  
610 Social Smiling in Infants at High and Low Risk for ASD. *J Autism Dev Disord*. 2016;46(7):2399-407.
- 611 34. Carter AS, Martínez-Pedraza Fde L, Gray SA. Stability and individual change in depressive  
612 symptoms among mothers raising young children with ASD: maternal and child correlates. *J Clin*  
613 *Psychol*. 2009;65(12):1270-80.
- 614 35. Rayport YK, Sania A, Lucchini M, Du Plessis C, Potter M, Springer PE, et al. Associations of  
615 adverse maternal experiences and diabetes on postnatal maternal depression and child social-  
616 emotional outcomes in a South African community cohort. *PLOS Glob Public Health*.  
617 2022;2(10):e0001124.
- 618 36. Hines M, Carpenito T, Martens A, Iizuka A, Aspinwall B, Zimmerman E. The home  
619 environment and its relation to vocalizations in the first year of life. *Pediatr Med*. 2022;5.
- 620 37. Bayley N. Bayley scales of infant and toddler development, third edition. San Antonio, TX:  
621 Harcourt; 2006.



- 622 38. Wolke D, Jaekel J, Hall J, Baumann N. Effects of sensitive parenting on the academic  
623 resilience of very preterm and very low birth weight adolescents. *J Adolesc Health*. 2013;53(5):642-7.
- 624 39. Vanes LD, Hadaya L, Kanel D, Falconer S, Ball G, Batalle D, et al. Associations Between  
625 Neonatal Brain Structure, the Home Environment, and Childhood Outcomes Following Very Preterm  
626 Birth. *Biological Psychiatry Global Open Science*. 2021;1(2):146-55.
- 627 40. Arnold DS, O'leary SG, Wolff LS, Acker MM. The Parenting Scale: a measure of dysfunctional  
628 parenting in discipline situations. *Psychological assessment*. 1993;5(2):137.
- 629 41. Cox JL, Holden JM, Sagovsky R. Detection of postnatal depression: development of the 10-  
630 item Edinburgh Postnatal Depression Scale. *The British journal of psychiatry*. 1987;150(6):782-6.
- 631 42. Benjamini Y, Hochberg Y. Controlling the False Discovery Rate: A Practical and Powerful  
632 Approach to Multiple Testing. *Journal of the Royal Statistical Society: Series B (Methodological)*.  
633 1995;57(1):289-300.
- 634 43. Jolliffe IT, Cadima J. Principal component analysis: a review and recent developments.  
635 *Philosophical Transactions of the Royal Society A: Mathematical, Physical and Engineering Sciences*.  
636 2016;374(2065):20150202.
- 637 44. Murray M, Bloom, J. *FDRestimation: Estimate, Plot, and Summarize False Discovery Rates*, . R  
638 Package. 1.0.1 ed2020.
- 639 45. Wei T, Simko, V. R package 'corrplot': Visualization of a Correlation  
640 Matrix. 0.92 ed2021.
- 641 46. Sun Z, Yang L, Bai X, Du W, Shen G, Fei J, et al. Maternal ambient air pollution exposure with  
642 spatial-temporal variations and preterm birth risk assessment during 2013–2017 in Zhejiang  
643 Province, China. *Environment International*. 2019;133:105242.
- 644 47. Werling DM, Geschwind DH. Sex differences in autism spectrum disorders. *Curr Opin Neurol*.  
645 2013;26(2):146-53.
- 646 48. Miller M, Musser ED, Young GS, Olson B, Steiner RD, Nigg JT. Sibling Recurrence Risk and  
647 Cross-aggregation of Attention-Deficit/Hyperactivity Disorder and Autism Spectrum Disorder. *JAMA*  
648 *Pediatr*. 2019;173(2):147-52.
- 649 49. Agrawal S, Rao SC, Bulsara MK, Patole SK. Prevalence of Autism Spectrum Disorder in  
650 Preterm Infants: A Meta-analysis. *Pediatrics*. 2018;142(3):e20180134.
- 651 50. Shaw ZA, Starr LR. Intergenerational transmission of emotion dysregulation: The role of  
652 authoritarian parenting style and family chronic stress. *Journal of Child and Family Studies*.  
653 2019;28:3508-18.
- 654 51. Klahr AM, Burt SA. Elucidating the etiology of individual differences in parenting: A meta-  
655 analysis of behavioral genetic research. *Psychol Bull*. 2014;140(2):544-86.
- 656 52. Johnston C, Murray C, Hinshaw SP, Pelham WE, Hoza B. Responsiveness in interactions of  
657 mothers and sons with ADHD: Relations to maternal and child characteristics. *Journal of abnormal*  
658 *child psychology*. 2002;30(1):77-88.
- 659 53. Miller-Lewis LR, Baghurst PA, Sawyer MG, Prior MR, Clark JJ, Arney FM, et al. Early childhood  
660 externalising behaviour problems: Child, parenting, and family-related predictors over time. *Journal*  
661 *of abnormal child psychology*. 2006;34(6):886-901.
- 662 54. Crowell JA, Keluskar J, Gorecki A. Parenting behavior and the development of children with  
663 autism spectrum disorder. *Comprehensive psychiatry*. 2019;90:21-9.
- 664 55. Ventola P, Lei J, Paisley C, Lebowitz E, Silverman W. Parenting a Child with ASD: Comparison  
665 of Parenting Style Between ASD, Anxiety, and Typical Development. *J Autism Dev Disord*.  
666 2017;47(9):2873-84.
- 667 56. Gau SS, Chou MC, Lee JC, Wong CC, Chou WJ, Chen MF, et al. Behavioral problems and  
668 parenting style among Taiwanese children with autism and their siblings. *Psychiatry Clin Neurosci*.  
669 2010;64(1):70-8.
- 670 57. Craig F, Operto FF, De Giacomo A, Margari L, Frolli A, Conson M, et al. Parenting stress  
671 among parents of children with Neurodevelopmental Disorders. *Psychiatry Res*. 2016;242:121-9.

- 672 58. Wan MW, Green J, Scott J. A systematic review of parent-infant interaction in infants at risk  
673 of autism. *Autism*. 2019;23(4):811-20.
- 674 59. Whitehouse AJO, Varcin KJ, Pillar S, Billingham W, Alvares GA, Barbaro J, et al. Effect of  
675 Preemptive Intervention on Developmental Outcomes Among Infants Showing Early Signs of Autism:  
676 A Randomized Clinical Trial of Outcomes to Diagnosis. *JAMA Pediatrics*. 2021;175(11):e213298-e.
- 677 60. Oliver BR, Trzaskowski M, Plomin R. Genetics of parenting: The power of the dark side. *Dev*  
678 *Psychol*. 2014;50(4):1233-40.
- 679 61. McQuillan ME, Bates JE, Staples AD, Deater-Deckard K. Maternal stress, sleep, and  
680 parenting. *Journal of Family Psychology*. 2019;33(3):349.
- 681 62. Khambadkone SG, Cordner ZA, Tamashiro K. Maternal stressors and the developmental  
682 origins of neuropsychiatric risk. *Front Neuroendocrinol*. 2020;57:100834.
- 683 63. La Placa V, Corlyon J. Unpacking the relationship between parenting and poverty: Theory,  
684 evidence and policy. *Social Policy and Society*. 2016;15(1):11-28.
- 685 64. Wild KT, Betancourt LM, Brodsky NL, Hurt H. The effect of socio-economic status on the  
686 language outcome of preterm infants at toddler age. *Early Hum Dev*. 2013;89(9):743-6.
- 687 65. de Laat SAA, Huizink AC, Hof MH, Vrijkotte TGM. Socio-economic inequalities in psychosocial  
688 problems of children: mediating role of maternal depressive symptoms. *Eur J Public Health*.  
689 2018;28(6):1062-8.
- 690 66. Abdullahi I, Wong K, Bebbington K, Mutch R, de Klerk N, Cherian S, et al. Diagnosis of Autism  
691 Spectrum Disorder According to Maternal-Race Ethnicity and Country of Birth: A Register-Based  
692 Study. *J Autism Dev Disord*. 2019;49(9):3611-24.
- 693 67. Kaščelan D, Katsos N, Gibson JL. Relations Between Bilingualism and Autistic-Like Traits in a  
694 General Population Sample of Primary School Children. *Journal of Autism and Developmental*  
695 *Disorders*. 2019;49(6):2509-23.
- 696 68. Kung KT, Constantinescu M, Browne WV, Noorderhaven RM, Hines M. No relationship  
697 between early postnatal testosterone concentrations and autistic traits in 18 to 30-month-old  
698 children. *Mol Autism*. 2016;7:15.
- 699 69. Auyeung B, Taylor K, Hackett G, Baron-Cohen S. Foetal testosterone and autistic traits in 18  
700 to 24-month-old children. *Mol Autism*. 2010;1(1):11.
- 701 70. Sandin S, Lichtenstein P, Kuja-Halkola R, Larsson H, Hultman CM, Reichenberg A. The Familial  
702 Risk of Autism. *JAMA*. 2014;311(17):1770-7.
- 703 71. Ben-Sasson A, Robins DL, Yom-Tov E. Risk Assessment for Parents Who Suspect Their Child  
704 Has Autism Spectrum Disorder: Machine Learning Approach. *J Med Internet Res*. 2018;20(4):e134-e.
- 705 72. Pasco G, Davies K, Ribeiro H, Tucker L, Allison C, Baron-Cohen S, et al. Comparison of Parent  
706 Questionnaires, Examiner-Led Assessment and Parents' Concerns at 14 Months of Age as Indicators  
707 of Later Diagnosis of Autism. *J Autism Dev Disord*. 2021;51(3):804-13.
- 708 73. Crump C, Sundquist J, Sundquist K. Preterm or Early Term Birth and Risk of Autism.  
709 *Pediatrics*. 2021;148(3).
- 710 74. Guy A, Seaton SE, Boyle EM, Draper ES, Field DJ, Manktelow BN, et al. Infants born  
711 late/moderately preterm are at increased risk for a positive autism screen at 2 years of age. *The*  
712 *Journal of pediatrics*. 2015;166(2):269-75. e3.
- 713 75. Gray PH. M-CHAT autism screening may be inaccurate among toddlers born very preterm.  
714 *The Journal of Pediatrics*. 2017;182:401-4.
- 715 76. Moore T, Johnson S, Hennessy E, Marlow N. Screening for autism in extremely preterm  
716 infants: problems in interpretation. *Developmental Medicine & Child Neurology*. 2012;54(6):514-20.
- 717 77. Parner ET, Baron-Cohen S, Lauritsen MB, Jørgensen M, Schieve LA, Yeargin-Allsopp M, et al.  
718 Parental age and autism spectrum disorders. *Ann Epidemiol*. 2012;22(3):143-50.
- 719 78. King MD, Bearman PS. Socio-economic status and the increased prevalence of autism in  
720 California. *American sociological review*. 2011;76(2):320-46.

- 721 79. Winter AS, Fountain C, Cheslack-Postava K, Bearman PS. The social patterning of autism  
722 diagnoses reversed in California between 1992 and 2018. *Proceedings of the National Academy of*  
723 *Sciences*. 2020;117(48):30295-302.
- 724 80. Avlund SH, Thomsen PH, Schendel D, Jørgensen M, Carlsen AH, Clausen L. Factors Associated  
725 with a Delayed Autism Spectrum Disorder Diagnosis in Children Previously Assessed on Suspicion of  
726 Autism. *Journal of Autism and Developmental Disorders*. 2021;51(11):3843-56.
- 727 81. Azim A, Rdesinski RE, Phelps R, Zuckerman KE. Nonclinical factors in autism diagnosis:  
728 Results from a national health care provider survey. *Journal of Developmental & Behavioral*  
729 *Pediatrics*. 2020;41(6):428-35.
- 730 82. Bolton P, Macdonald H, Pickles A, Rios Pa, Goode S, Crowson M, et al. A case-control family  
731 history study of autism. *Journal of child Psychology and Psychiatry*. 1994;35(5):877-900.
- 732 83. Chen L-C, Chen M-H, Hsu J-W, Huang K-L, Bai Y-M, Chen T-J, et al. Association of parental  
733 depression with offspring attention deficit hyperactivity disorder and autism spectrum disorder: A  
734 nationwide birth cohort study. *Journal of affective disorders*. 2020;277:109-14.
- 735 84. Thabtah F, Peebles D. Early autism screening: a comprehensive review. *International journal*  
736 *of environmental research and public health*. 2019;16(18):3502.
- 737 85. Roman-Urrestarazu A, van Kessel R, Allison C, Matthews FE, Brayne C, Baron-Cohen S.  
738 Association of Race/Ethnicity and Social Disadvantage With Autism Prevalence in 7 Million School  
739 Children in England. *JAMA Pediatrics*. 2021;175(6):e210054-e.
- 740 86. Mottron L. A radical change in our autism research strategy is needed: Back to prototypes.  
741 *Autism Research*. 2021;n/a(n/a).
- 742 87. Constantino JN. Response to “A Radical Change in Our Autism Research Strategy is Needed:  
743 Back to Prototypes” by Mottron et al. (2021). *Autism Research*. 2021;n/a(n/a).

744

745

746

747

748

749

750

751

752 **Figures**

753

754 **A**

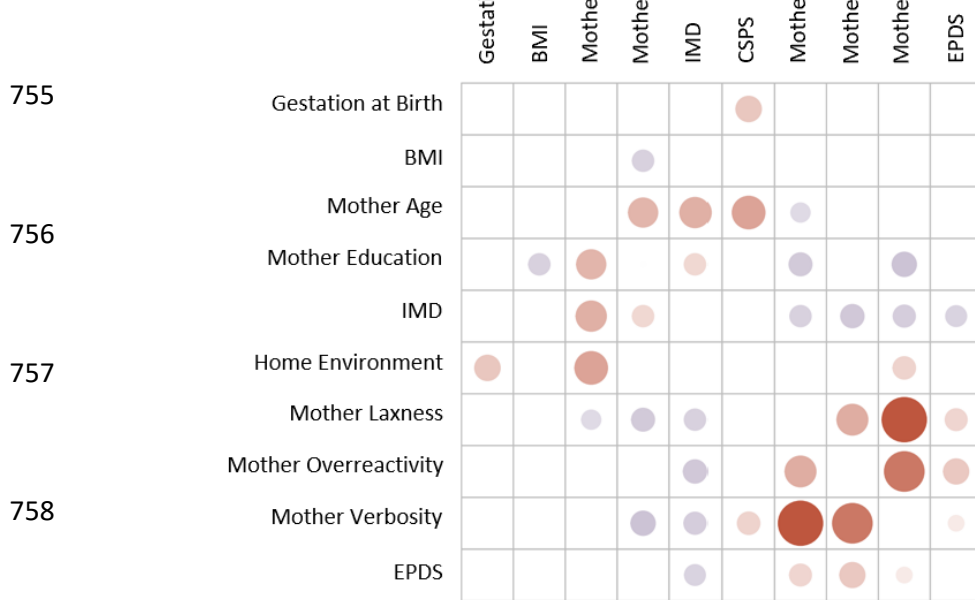

759 **B**

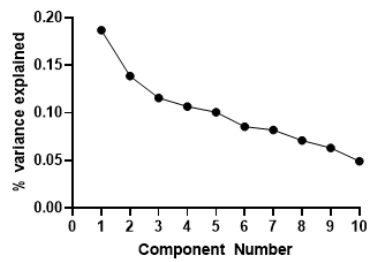

759 **C**

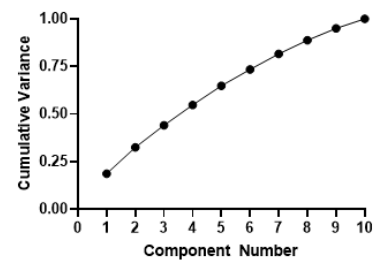

761

762 **D**

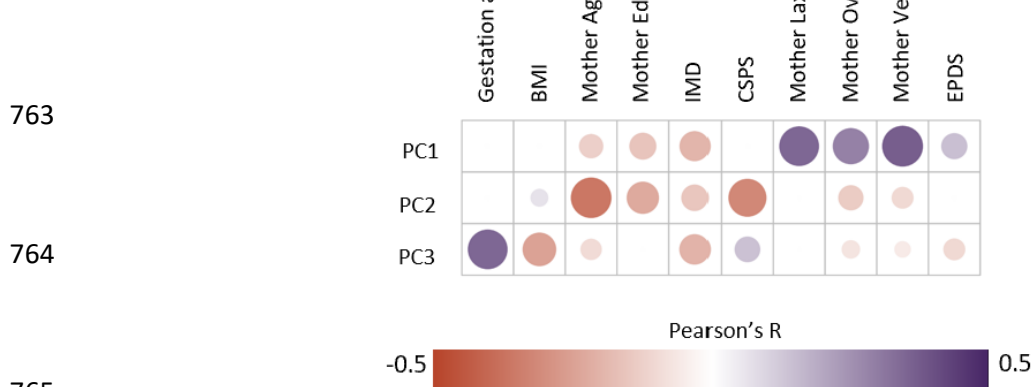

766 **Figure 1** – *Principal Component Analysis of linear variables. A Correlogram of associations between*  
767 *linear variables. Pearson’s r indicated for correlations with  $p < 0.05$ . B Scree plot of PCA components C*  
768 *Cumulative variance plot of PCA components D Correlations of original linear variables to principal*  
769 *components. Correlation indicated by size and colour of circle. Only correlations remaining significant*  
770 *( $p < 0.05$ ) after FDR correction are shown. Values of each correlation are shown in Supplementary*  
771 *Table S2.*

772

773

774

775

776

777

778

779

780

781

782

783 **Tables**

784 **Table 1. Sample Characteristics.** Mean, standard deviation, and range displayed for linear variables.  
 785 Frequency displayed for categorical variables. Correlations to QCHAT calculated by Pearson’s r or t-  
 786 test as appropriate. Significant univariable correlations are shown in bold, those remaining significant  
 787 after FDR correction indicated by \*.

| <b>Outcome variable</b>                                                |                              |                            |
|------------------------------------------------------------------------|------------------------------|----------------------------|
| Total Q-CHAT Score, <i>Mean (SD), Range</i>                            | 30.1 (5.9), 8-70             | -                          |
| <b>Clinical variables</b>                                              |                              | <b>r (p)</b>               |
| Age at follow-up [months], <i>Mean (SD), Range</i>                     | 18.8 (1.6), 16-26            | 0.010 (0.535)              |
| Gestational Age at Birth [weeks], <i>Mean (SD), Range</i>              | 38.1 (3.9), 23.0-43.0        | -0.067 (0.120)             |
| BMI [kg/m <sup>2</sup> ], <i>Mean (SD), Range</i>                      | 24.2 (4.4), 15.3-43.4        | <b>0.093 (0.030)</b>       |
| Mother Age [years], <i>Mean (SD), Range</i>                            | 34.3 (4.7), 17-52            | <b>-0.105 (0.014)</b>      |
|                                                                        |                              | <b>t (p)</b>               |
| Sex [Male (0), Female (1)], <i>N (%)</i>                               | 278 (52%), 258 (48%)         | 1.820 (0.068)              |
| Parent ASD/ADHD Diagnosis [Yes (1), No (0)], <i>N (%)</i>              | 28 (5%), 508 (95%)           | -0.4246 (0.674)            |
| <b>Socio-demographic variables</b>                                     |                              | <b>r (p)</b>               |
| IMD Rank, <i>Mean (SD), Range</i>                                      | 14626.2 (7409.2), 2410-32726 | <b>-0.190 (&lt;0.001)*</b> |
| CSPS, <i>Mean (SD), Range</i>                                          | 20.5 (3.5), 7-28             | <b>-0.219 (&lt;0.001)*</b> |
| Mother Education [years], <i>Mean (SD), Range</i>                      | 23.6 (4.5), 12-43            | 0.001 (0.957)              |
|                                                                        |                              | <b>t (p)</b>               |
| Mother 1 <sup>st</sup> Language [English (1), Other (0)], <i>N (%)</i> | 338 (63%), 198 (37%)         | <b>4.518 (&lt;0.001)*</b>  |
| Parents Cohabiting [Yes (0), No (1)], <i>N (%)</i>                     | 520 (97%), 16 (3%)           | -1.650 (0.119)             |
| <b>Parental-psychological variables</b>                                |                              | <b>r (p)</b>               |
| Mother Laxness, <i>Mean (SD), Range</i>                                | 2.9 (0.8), 1-5.6             | <b>0.286 (&lt;0.001)*</b>  |
| Mother Over-reactivity, <i>Mean (SD), Range</i>                        | 2.2 (0.7), 1-5.1             | <b>0.180 (&lt;0.001)*</b>  |
| Mother Verbosity, <i>Mean (SD), Range</i>                              | 3.4 (0.8), 1-6.4             | <b>0.300 (&lt;0.001)*</b>  |
| Mother EPDS, <i>Mean (SD), Range</i>                                   | 4.5 (4.2), 0-28              | <b>0.127 (&lt;0.001)*</b>  |
| BSID-III Cognitive Composite, <i>Mean (SD), Range</i>                  | 101.0 (11.1), 55-130         | <b>-0.358 (&lt;0.001)*</b> |
| BSID-III Language Composite, <i>Mean (SD), Range</i>                   | 98.2 (15.4), 47-153          | <b>-0.528 (&lt;0.001)*</b> |
| BSID-III Motor Composite, <i>Mean (SD), Range</i>                      | 101.5 (10.2), 52-130         | <b>-0.267 (&lt;0.001)*</b> |

788

789

790

791 **Table 2.** General linear model of the association between clinical, socio-demographic, and parental  
 792 variables and Q-CHAT with or without the addition of BSID-III Cognitive, Motor and Language  
 793 Composite Scores to the model. Non-reference categories are as follows: Sex – Male, Parent  
 794 ASD/ADHD Diagnosis – Yes, Mother 1<sup>st</sup> Language – Not English.

|                                         | <i>Without BSID-III</i>                       |                   | <i>With BSID-III</i>                          |                   |
|-----------------------------------------|-----------------------------------------------|-------------------|-----------------------------------------------|-------------------|
|                                         | $r^2$ (Adj. $r^2$ ) = 0.20(0.19), $p < 0.001$ |                   | $r^2$ (Adj. $r^2$ ) = 0.36(0.34), $p < 0.001$ |                   |
|                                         | <b>t</b>                                      | <b>p</b>          | <b>t</b>                                      | <b>p</b>          |
| Gestational Age at Birth                | -1.94                                         | 0.052             | -0.45                                         | 0.646             |
| BMI                                     | 0.57                                          | 0.567             | 0.95                                          | 0.341             |
| Mother Age                              | -0.73                                         | 0.461             | -1.17                                         | 0.239             |
| Sex                                     | <b>-2.32</b>                                  | <b>0.020</b>      | -0.83                                         | 0.407             |
| Parent ASD/ADHD Diagnosis               | 0.57                                          | 0.567             | -0.23                                         | 0.813             |
| IMD Rank                                | <b>-2.56</b>                                  | <b>0.010*</b>     | <b>-2.06</b>                                  | <b>0.039</b>      |
| CSPS                                    | <b>-3.38</b>                                  | <b>&lt;0.001*</b> | -1.17                                         | 0.238             |
| Mother Education                        | -0.08                                         | 0.929             | 0.35                                          | 0.719             |
| Mother 1 <sup>st</sup> Language English | -1.58                                         | 0.113             | -0.01                                         | 0.994             |
| Parents Cohabiting                      | 1.74                                          | 0.082             | 1.49                                          | 0.135             |
| Mother Laxness                          | <b>3.79</b>                                   | <b>&lt;0.001*</b> | <b>2.68</b>                                   | <b>0.007*</b>     |
| Mother Over-reactivity                  | 1.11                                          | 0.269             | 1.04                                          | 0.297             |
| Mother Verbosity                        | <b>3.29</b>                                   | <b>0.001*</b>     | <b>3.39</b>                                   | <b>&lt;0.001*</b> |
| Mother EPDS                             | 1.72                                          | 0.08              | 1.26                                          | 0.206             |
| Cognitive Composite                     | NA                                            | NA                | -0.28                                         | 0.779             |
| Language Composite                      | NA                                            | NA                | <b>-8.32</b>                                  | <b>&lt;0.001*</b> |
| 795 Motor Composite                     | NA                                            | NA                | -0.41                                         | 0.677             |

796 *Bold indicates  $p < 0.05$ , \* indicates significance after FDR multiple comparison correction ( $\alpha < 0.05$ )*

797

798

799

800

801

802

803

804 **Table 3.** General linear model of the association between demographic variables, BSID-III composite  
 805 scores and Q-CHAT. Linear variables were first transformed into orthogonal components via PCA. PC1  
 806 captures variable associations which are associated with positive parenting styles and low socio-  
 807 economic deprivation, PC2 is associated with low socio-economic deprivation and expressive  
 808 parenting styles, and PC3 is associated with variables describing clinical adversity.

|                                         | <i>Without BSID-III</i>                                            |                   | <i>With BSID-III</i>                                               |                   |
|-----------------------------------------|--------------------------------------------------------------------|-------------------|--------------------------------------------------------------------|-------------------|
|                                         | <i>r<sup>2</sup> (Adj. r<sup>2</sup>) = 0.17(0.16), p&lt;0.001</i> |                   | <i>r<sup>2</sup> (Adj. r<sup>2</sup>) = 0.35(0.33), p&lt;0.001</i> |                   |
|                                         | <b>t</b>                                                           | <b>p</b>          | <b>t</b>                                                           | <b>p</b>          |
| PC1                                     | <b>-8.17</b>                                                       | <b>&lt;0.001*</b> | <b>-6.59</b>                                                       | <b>&lt;0.001*</b> |
| PC2                                     | -1.86                                                              | 0.062             | -0.70                                                              | 0.480             |
| PC3                                     | 1.29                                                               | 0.194             | 0.10                                                               | 0.913             |
| Sex                                     | -2.02                                                              | 0.043             | -0.48                                                              | 0.630             |
| Parent ASD/ADHD Diagnosis               | 0.59                                                               | 0.550             | -0.26                                                              | 0.790             |
| Mother 1 <sup>st</sup> Language English | -1.86                                                              | 0.063             | -0.06                                                              | 0.948             |
| Parents Cohabiting                      | 2.04                                                               | 0.041             | 1.51                                                               | 0.129             |
| Cognitive Composite                     | NA                                                                 | NA                | -0.55                                                              | 0.577             |
| Language Composite                      | NA                                                                 | NA                | <b>-8.96</b>                                                       | <b>&lt;0.001*</b> |
| Motor Composite                         | NA                                                                 | NA                | -0.15                                                              | 0.880             |

809  
 810 *Bold indicates p<0.05, \* indicates significance after FDR multiple comparison correction (α<0.05)*

811
